# Supplementary material for: Cost–effectiveness of long-acting injectable aripiprazole once-monthly 400 mg in bipolar I disorder in the USA
Source: Atypon-hosted journal article supplement (doi:10.2217/cer-2018-0010), 2018-04-25
Supplement: suppl_materials.docx [file suppl_materials.docx]

**SUPPLEMENTAL MATERIALS**

**Supplemental Table 1. Health state utility values**

| **Health state** | **Utility** | **Distribution in PSA** | **Reference** |
| --- | --- | --- | --- |
| Euthymia | 0.80 | Beta | Revicki et al [32] |
| Manic | 0.24 | Beta | Revicki et al [32] |
| Depressive | 0.29 | Beta | Revicki et al [32] |
| Mixed | 0.24 | Beta | Revicki et al [32] |

**Supplemental Table 2. Treatment emergent adverse event cost, utility decrement and frequency per year by treatment.**

| Adverse Event | Cost | Resources Use (per Year)* |  | Utility decrement** |  | Reference for utility decrement | Rate of AE employed in the model** | | | | | | |
| --- | --- | --- | --- | --- | --- | --- | --- | --- | --- | --- | --- | --- | --- |
| AOM 400 [18] | Risperidone [25] | Paliperidone palmitate [27] | Cariprazine [28] | Asenapine [29] | BSC [18] |  |
| Abdominal Pain | $103.36 | 2 outpatient visit, 1 course of antacid, 1 short course of pain killer |  | 0.070 |  | [37] | - | - | - | 2.25% | - | - |  |
| Agitation | $107.98 | 2 outpatient visit, 1 course of low dose anxiolytic |  | 0.050 |  | Assumption | - | - | 3.33% | - | - | - |  |
| Akathisia | $107.98 | 2 outpatient visit, 1 course of low dose anxiolytic |  | 0.115 |  | [33] | 21.21% | - | - | 6.58% | - | 12.78% |  |
| Anxiety | $107.98 | 2 outpatient visit, 1 course of low dose anxiolytic |  | 0.050 |  | Assumption | 6.82% | - | 2.68% | - | - | 4.51% |  |
| Constipation | $0.00 | Over the counter laxative, every day |  | 0.047 |  | [36] | - | - | - | 2.73% | - | - |  |
| Decreased Appetite | $0.00 | Short course of nutritional substitute (Fortisip), for 90 days |  | 0.254 |  | [37] | - | 8.33% | - | - | - | - |  |
| Diarrhea | $51.68 | 1 outpatient visit, week of daily rehydration fluid and loperamide |  | 0.047 |  | [36] | - | - | - | 1.77% |  | - |  |
| Dizziness | $103.36 | 2 outpatient visits, 1 short course of cinnarizine |  | 0.048 |  | [36] | - | - | 1.54% | 2.09% | 11.00% | - |  |
| Dry Mouth | $206.72 | 4 outpatient visits, daily biotene gel or lozenges |  | 0.070 |  | [34] | - | - | - | - | - | - |  |
| Dyspepsia | $103.36 | 2 outpatient visit, daily antacid |  | 0.070 |  | [34] | - | - | - | 2.57% | - | - |  |
| Extrapyramidal disorder | $266.99 | 4 outpatient visits, daily low dose anxiolytic, daily propranolol |  | 0.074 |  | [49]**†** | - | 29.17% | 0.89% | 8.83% | - | - |  |
| Fatigue | $0.00 | Short course of nutritional substitute (Fortisip), for 90 days |  | 0.115 |  | [33] | - | - | - | 1.44% | - | - |  |
| Headache | $51.68 | 1 outpatient visit, 1 course of pain killer |  | 0.030 |  | [36] | - | - | 4.95% | 4.33% | 12.00% | - |  |
| Hypertension | $211.75 | 4 outpatient visits, daily anti-hypertensive |  | 0.124 |  | [35] | - | - | - | 1.44% | - | - |  |
| ISR | $51.68 | 1 outpatient visit, 1 topical anti-histamine cream |  | 0.011 |  | [36] | - | - | 2.92% | - | - | - |  |
| Insomnia | $266.99 | 4 outpatient visits, daily low dose anxiolytic |  | 0.060 |  | [34] | 7.58% | - | - | 2.73% | 6.00% | 7.52% |  |
| Nausea | $57.28 | 1 outpatient visit, 1 course of anti-emetics |  | 0.048 |  | [36] | - | - | - | 3.85% | - | - |  |
| Restlessness | $107.98 | 2 outpatient visit, 1 course of low dose anxiolytic |  | 0.115 |  | [33] | - | - | - | 2.25% | - | - |  |
| Somnolence/sedation | $51.68 | 1 outpatient visit |  | 0.060 |  | [34] | - | 9.72% | 2.19% | 2.41% | 24.00% | - |  |
| Tremor | $66.53 | 1 outpatient visit, 90 days course of propranolol |  | 0.055 |  | [34] | - | 33.33% | - | - | - | - |  |
| Upper respiratory tract infection | $114.11 | 2 outpatient visits, 2 courses of broad spectrum antibiotics |  | 0.020 |  | [36] | - | 8.33% | - | - | - | - |  |
| Vomiting | $54.48 | 1 outpatient visit, 1 course of anti-emetics |  | 0.103 |  | [33] | - | - | 1.46% | 2.89% | - | - |  |
| Weight Increase | $0.00 | No additional action |  | 0.066 |  | [32] | 23.48% | 9.72% | - | - | 5.00% | 18.05% |  |

ISR = Injection Site Reactions; RTI = respiratory tract infection; BSC = Best Supportive Care; LAI = Long Acting Injectable

*Distribution in PSA: gamma; **distribution in PSA: beta.

† [49] Lachaine J, Beauchemin C, Mathurin K, Gilbert D, Beillat M. Cost–effectiveness of asenapine in the treatment of schizophrenia in Canada. *J. Med. Econ.* 17(4), 296-304 (2014).

**Supplemental Table 3. All costs and utility values, except those related to AE]**

| Treatments or item | WAC ($)  unit cost | | Number of administrations  (per year) | | Cycle cost | Distribution in the PSA | Reference  [40] |
| --- | --- | --- | --- | --- | --- | --- | --- |
| ***Drug acquisition costs – euthymic state*** | | | | | | | |
| **Formulation (% patients)** |  | |  | |  |  |  |
| **AOM** |  | |  | |  |  |  |
| 300 mg (17.8) | $1407.59 | | 12.00 | | $16,891 |  |  |
| 400 mg (82.2) | $1876.79 | | $22,521 |  |  |
| ***Average*** |  | |  | | ***$21,522*** | Gamma |  |
| **Risperidone LAI** |  | | 26.00 | |  |  |  |
| 12.5 mg (5.7) | $208.25 | | $5415 |  |  |
| 25 mg (32.9) | $416.45 | | $10,828 |  |  |
| 37.5 mg (28.7) | $624.71 | | $16,242 |  |  |
| 50 mg (32.8) | $832.96 | | $21,657 |  |  |
| ***Average*** |  | |  | | ***$15,625*** | Gamma |  |
| **Paliperidone palmitate** |  | |  | |  |  |  |
| 39 mg (0.3) | $382.89 | | 12.00 | | $4595 |  |  |
| 78 mg (2.0) | $765.82 | | $9190 |  |  |
| 117 mg (23.9) | $1148.74 | | $13,785 |  |  |
| 156 mg (39.5) | $1531.72 | | $18,381 |  |  |
| 234 mg (34.3) | $2297.52 | | $27,570 |  |  |
| ***Average*** |  | |  | | ***$20,205*** | Gamma |  |
| **Cariprazine** |  | |  | |  |  |  |
| 1.5 mg (32.5) | $33.54 | | 365.25 | | $12,249 |  |  |
| 3 mg (54.0) | $33.54 | | $12,249 |  |  |
| 4.5 mg (7.9) | $33.54 | | $12,249 |  |  |
| 6 mg (5.5) | $33.54 | | $12,249 |  |  |
| ***Average*** |  | |  | | **$12,249** | Gamma |  |
| **Asenapine** |  | |  | |  |  |  |
| 2.5 mg (5.4) | $18.28 | | 365.25 | | $6676 |  |  |
| 5 mg (36.1) | $16.02 | | $5850 |  |  |
| 10 mg (58.5) | $16.02 | | $5850 |  |  |
| ***Average*** |  | |  | | ***$5894*** | Gamma |  |
| **Best supportive care** |  | |  | |  |  |  |
| BSC (100) | $40.91 | | 365.25 | | ***$40.91*** | Gamma |  |
| ***Treatment initiation costs*** | | | | | | | |
| **Treatment** | **Cost per day** | | **Duration** | | **Cost of oral overlap** | Distribution in the PSA | Reference  [40] |
| AOM 400 (oral aripiprazole) | $9.49 | | 14 days | | $135.71 |  |  |
| Risperidone LAI (oral risperidone) | $5.60 | | 21 days | | $117.69 |  |  |
| **Treatment** | **Drug cost** | | **Administration cost** | | **Cost of intramuscular overlap** | Distribution in the PSA | Reference  [41] |
| Paliperidone palmitate LAI  (234 mg on Day 0; 156 mg on Day 8) | $3829.24 | | $53.23 | | $3882.47 |  |  |
| ***Drug administration cost per administration*** | | | | | | | |
| **Route of administration** | **Cost** | | **Resource use per administration** | | **Cycle cost** | Distribution in the PSA | Reference |
| Oral | $0 | |  | | $0 | Gamma |  |
| Intramuscular | $26.61 | | 1 | | 12 administrations: $319.37  26 administrations: $691.97 | Gamma |  |
| ***Health state costs – euthymic state, non-pharmaceutical*** | | | | | | | |
| **Resource** | **Proportion of cohort** | **Unit cost** | | **Number per year** | **Total cost, per year** | Distribution in the PSA | Reference  [41,42] |
| Urea and electrolytes | 100% | $11.59 | | 1 | $11.59 |  |  |
| Full blood count | 100% | $11.59 | | 1 | $11.59 |  |  |
| Blood lipids | 100% | $11.59 | | 1 | $11.59 |  |  |
| Weight | 100% | $9.50 | | 1 | $9.50 |  |  |
| Plasma glucose | 100% | $5.86 | | 1 | $5.86 |  |  |
| Prolactin | 100% | $11.59 | | 1 | $11.59 |  |  |
| Liver function tests | 100% | $12.19 | | 1 | $12.19 |  |  |
| Creatinine phosphokinase | 8% | $11.59 | | 1 | $0.97 |  |  |
| Blood pressure | 8% | $9.50 | | 1 | $0.79 |  |  |
| Electrocardiogram | 8% | $17.19 | | 1 | $1.43 |  |  |
| **Total** |  |  | |  | **$77.11** | **Gamma** |  |
| ***Pharmaceutical treatment in the subsequent euthymic state*** | | | | | | | |
| **Treatment (% of patients)** | **Unit cost** | | **# administrations per year** | | **Total cost per year** | Distribution in the PSA | Reference  [40] |
| Aripiprazole once-monthly (17%) | $21,521.69 | | 1 | | $3,586.95 |  |  |
| LAI risperidone (17%) | $15,624.84 | | 1 | | $2,604.14 |  |  |
| LAI paliperidone (17%) | $20,205.16 | | 1 | | $3,367.53 |  |  |
| Oral cariprazine (17%) | $12,249.02 | | 1 | | $2,041.50 |  |  |
| Oral asenapine (17%) | $5,894.12 | | 1 | | $982.35 |  |  |
| BSC (17%) | $40.91 | | 1 | | $6.82 |  |  |
| **Total (100%)** |  | |  | | **$12,589.29** | **Gamma** |  |
| ***Pharmaceutical treatment – manic episode*** | | | | | | | |
| **Treatment (% of patients)** | **Unit cost** | | **# Administrations per year** | | **Total cost per year** | **Distribution in the PSA** | **Reference**  **[40]** |
| Lithium (600mgx2.5/day) (13%) | $1.51 | | 36.53 | | $6.91 |  |  |
| Valproate (60mg/kg/day) (assuming 70kg) (13%) | $200.73 | | 36.53 | | $916.46 |  |  |
| Oral risperidone (6mg/day) (13%) | $5.60 | | 36.53 | | $25.59 |  |  |
| Olanzapine (10-15mg/day) (13%) | $4.19 | | 36.53 | | $19.13 |  |  |
| Carbamazepine (200mgx2/day) (13%) | $2.64 | | 36.53 | | $12.07 |  |  |
| Quetiapine (600mg/day) (13%) | $2.85 | | 36.53 | | $13.02 |  |  |
| Oral aripiprazole (30mg/day) (13%) | $11.96 | | 36.53 | | $54.60 |  |  |
| Ziprasidone (40mgx2/day) (13%) | $3.90 | | 36.53 | | $17.79 |  |  |
| **Total (100%)** |  | |  | | **$1065.58** | **Gamma** |  |
| ***Hospitalization cost – manic episode*** | | | | | | | |
| **Type of hospitalization** | **Proportion of patients** | | **Cost** | | **Total cost per year** | **Distribution in the PSA** | **Reference**  **[44]** |
| ICD-9-CM diagnosis codes 296.00-296.06, 296.10-296.16, 296.40-296.46, 296.81 | 100% | | $8753.74 | | $8753.74 | Gamma |  |
| ***Pharmaceutical treatment – depressive episode*** | | | | | | | |
| **Treatment (% of patients)** | **Unit cost** | | **# Administrations per year** | | **Total cost per year** | **Distribution in the PSA** | **Reference**  **[40]** |
| Olanzapine (5 mg) + fluoxetine (20 mg) (25%) | $11.30 | | 116.88 | | $330.13 |  |  |
| Quetiapine (300mg/day) (25%) | $1.43 | | 116.88 | | $41.68 |  |  |
| Lamotrigine (150 mg) (25%) | $16.27 | | 116.88 | | $475.34 |  |  |
| Lithium (600mgx2/day) + fluoxetine (20mg) (25%) | $2.70 | | 116.88 | | $78.75 |  |  |
| **Total (100%)** |  | |  | | **$925.89** | **Gamma** |  |
| ***Hospitalization cost – depressive episode*** | | | | | | | |
| **Type of hospitalization** | **Proportion of patients** | | **Cost** | | **Total cost per year** | **Distribution in the PSA** | **Reference**  **[44]** |
| ICD-9-CM diagnosis codes 296.50-296.56, 296.82 | 100% | | $5675.42 | | $5675.42 | Gamma |  |
| ***Pharmaceutical treatment – mixed episode*** | | | | | | | |
| **Treatment (% of patients)** | **Unit cost** | | **# Administrations per year** | | **Total cost per year** | **Distribution in the PSA** | **Reference**  **[40]** |
| Lithium (600mgx2.5/day) (13%) | $1.51 | | 36.53 | | $6.91 |  |  |
| Valproate (60mg/kg/day) (assuming 70kg) (13%) | $200.73 | | 36.53 | | $916.46 |  |  |
| Oral risperidone (6mg/day) (13%) | $5.60 | | 36.53 | | $25.59 |  |  |
| Olanzapine (10-15mg/day) (13%) | $4.19 | | 36.53 | | $19.13 |  |  |
| Carbamazepine (200mgx2/day) (13%) | $2.64 | | 36.53 | | $12.07 |  |  |
| Quetiapine (600mg/day) (13%) | $2.85 | | 36.53 | | $13.02 |  |  |
| Oral aripiprazole (30mg/day) (13%) | $11.96 | | 36.53 | | $54.60 |  |  |
| Ziprasidone (40mgx2/day) (13%) | $3.90 | | 36.53 | | $17.79 |  |  |
| **Total (100%)** |  | |  | | **$1065.58** | **Gamma** |  |
| ***Hospitalization cost - mixed episode*** | | | | | | | |
| **Type of hospitalization** | **Proportion of patients** | | **Cost** | | **Total cost per year** | **Distribution in the PSA** | **Reference**  **[44]** |
| ICD-9-CM diagnosis codes 296.60-296.66 | 100% | | $5976.43 | | $5976.43 | Gamma |  |

**Supplemental Table 4. Key assumptions and data gaps within the economic model.**

| **Model input** | **Data gap/assumption** | **Impact on ICER** | **Explanation** |
| --- | --- | --- | --- |
| Mood episode probabilities | All oral comparators are assumed to have the same probabilities of relapse | High Impact | Due to the lack of head-to-head comparisons and published meta-analysis or mixed treatment comparison, the assumption was made as deemed justified |
| Disease costs | It is assumed that the euthymic, manic, mixed and depressive health states costs are applied as a constant cost | Medium impact | Assuming these costs are constant is a conservative approach. There is insufficient evidence to amend this assumption |
| QoL | Treatment-specific utility values per health state are not applied; the model uses an overall value for all treatments | Medium impact | As some of the comparators are used off label in the treatment of BP-I, there were no data available on the utility levels of target patients treated with all comparators |
| Maintenance therapy | No maintenance treatment is assumed during a cycle with an acute episode. | Low impact | This is a conservative approach since AOM with better efficacy will have more time on maintenance treatment than less efficacious drugs. |
| Compliance | The model assumes compliance 100% to treatment | Medium to low impact | Traditionally, compliance rates seen within clinical trials are higher than those in a real-world setting and the evidence suggested compliance is lower in BP-I patients than in other disease areas. However, the expected compliance of AOM 400, and the impact this has on efficacy, is unknown at this point. Without further information, a 100% compliance rate is inherently assumed |
| Adverse events | It is assumed all AEs are applied as a one-off cost in the first cycle of the model | Low impact | For AEs that do not occur within the first year, or which are ongoing, their application in the model in the first cycle may over-estimate costs and disutility due to discounting |
| Subsequent treatment | Subsequent treatment costs assume that all interventions compared are equally likely to be used as a subsequent euthymic treatment | Low impact | The approach taken was conservative by not favoring any treatment since there is insufficient evidence to prioritize one maintenance treatment over another |

AE, adverse event; AOM 400, aripiprazole once-monthly 400 mg; BP-I, bipolar I disorder; ICER, incremental cost-effectiveness ratio; QoL, quality of life.
